# Supplementary material for: Triazolopyridopyrimidines: an emerging family of effective DNA photocleavers. DNA binding. Antileishmanial activity
Source: Royal Society of Chemistry journal article supplement (doi:10.1039/c5ob00280j), 2015-01-01
Supplement: c5ob00280j1.pdf [file c5ob00280j1.pdf]

## Electronic Supplementary Information

### **Triazolopyridopyrimidines: an emerging family of effective DNA photocleavers. DNA binding. Antileishmanial activity**

Rosa Adam,<sup>a</sup> Pablo Bilbao-Ramos,<sup>b</sup> Belén Abarca,<sup>\*a</sup> Rafael Ballesteros,<sup>\*a</sup> M. Eugenia González-Rosende,<sup>c</sup> M. Auxiliadora Dea-Ayuela,<sup>b,c</sup> Francisco Estevan,<sup>d</sup> Gloria Alzuet-Piña<sup>\*c</sup>

<sup>a</sup>*Departament de Química Orgànica, Facultat de Farmàcia, Universitat de València, Av. Vicent Andrés Estellés s/n, 46100 Burjassot (Valencia), Spain*

*E-mail: [Rafael.Ballesteros@uv.es](mailto:Rafael.Ballesteros@uv.es), [Belén.Abarca@uv.es](mailto:Belén.Abarca@uv.es)*

<sup>b</sup>*Departamento de Parasitología, Universidad Complutense de Madrid, Plaza Ramón y Cajal s/n, 28040 Madrid, Spain*

<sup>c</sup>*Departamento de Farmacia, Universidad CEU Cardenal Herrera, Avda. Seminario s/n, 46113 Moncada (Valencia), Spain*

<sup>d</sup>*Departament de Química Inorgànica, Facultat de Química, Universitat de València, Dr. Moliner 50, 46100 Burjassot (Valencia), Spain*

<sup>e</sup>*Departament de Química Inorgànica, Facultat de Farmàcia, Universitat de València, Av. Vicent Andrés Estellés s/n, 46100 Burjassot (Valencia), Spain*

*E-mail: [Gloria.Alzuet@uv.es](mailto:Gloria.Alzuet@uv.es)*

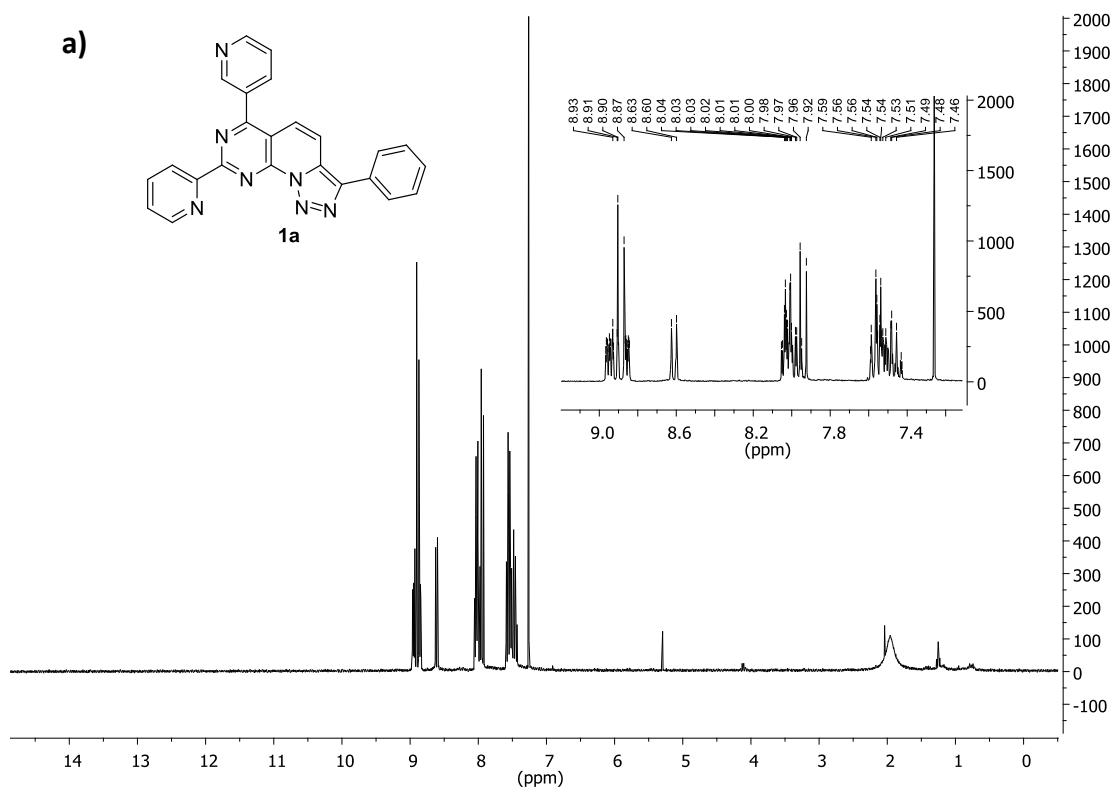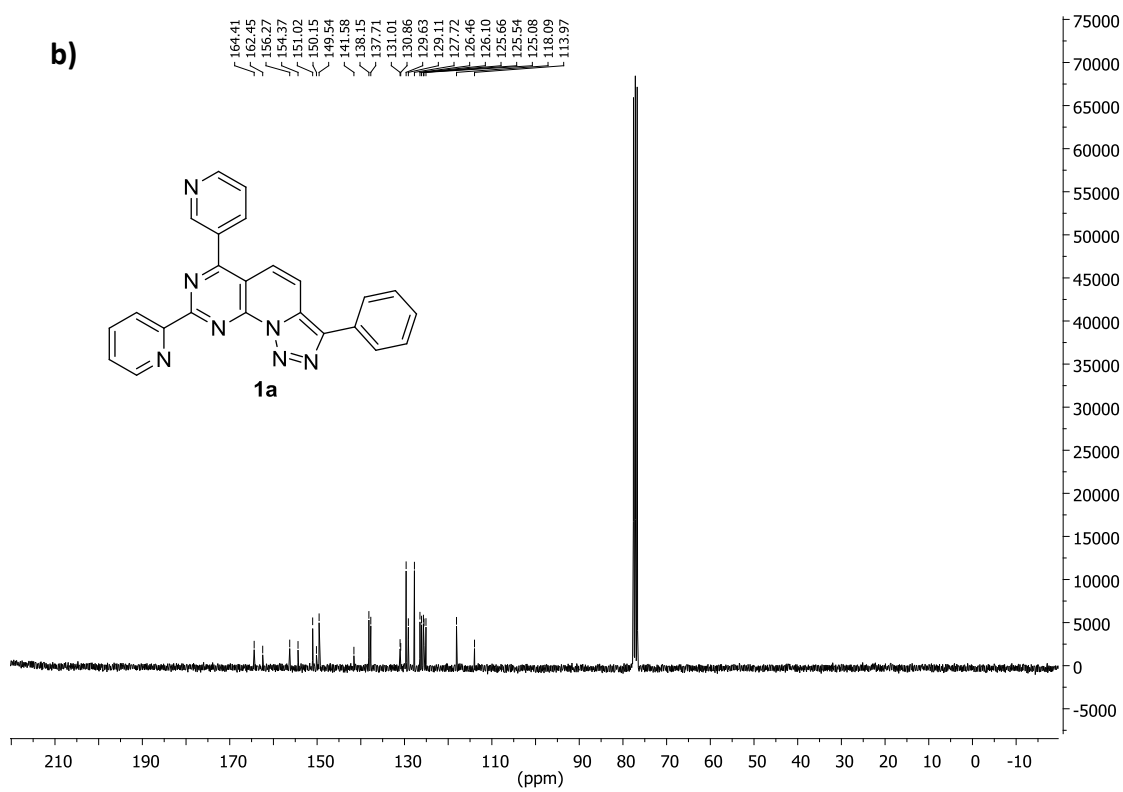

Figure S1. a) **1a**  $^1\text{H}$  NMR (CDCl<sub>3</sub>). b) **1a**  $^{13}\text{C}$  NMR (CDCl<sub>3</sub>).

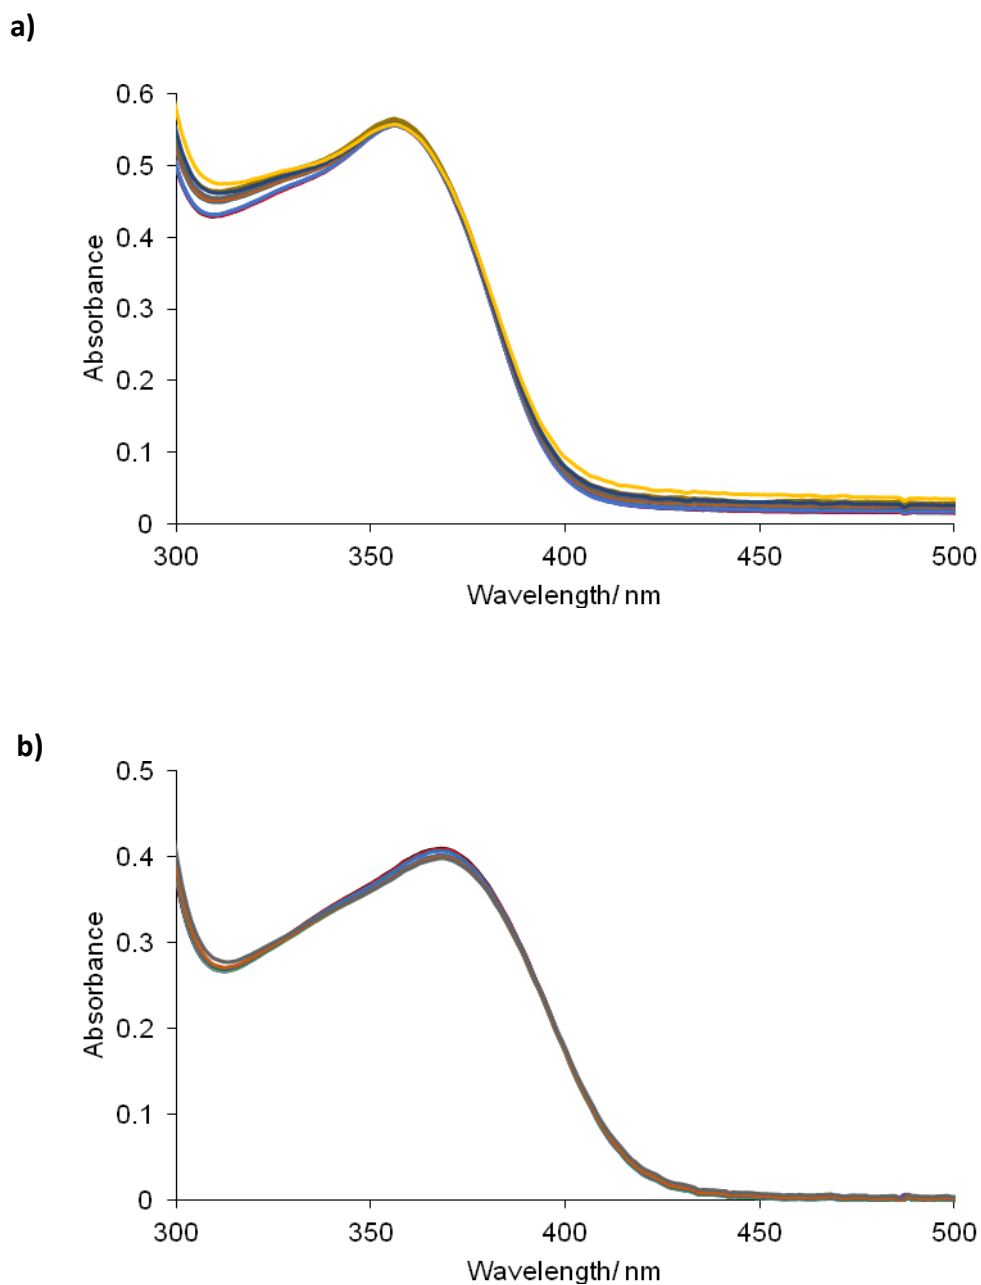

**Figure S2.** a) **1b** (40 μM) UV spectra in cacodylate buffer 0.1 M, pH= 6.0, 5% DMF in the absence and in the presence of increasing concentrations of CT-DNA (20-160 μM). b) **1c** (40 μM) UV spectra in cacodylate buffer 0.1 M, pH= 6.0, 5% DMF in the absence and in the presence of increasing concentrations of CT-DNA (20-160 μM).

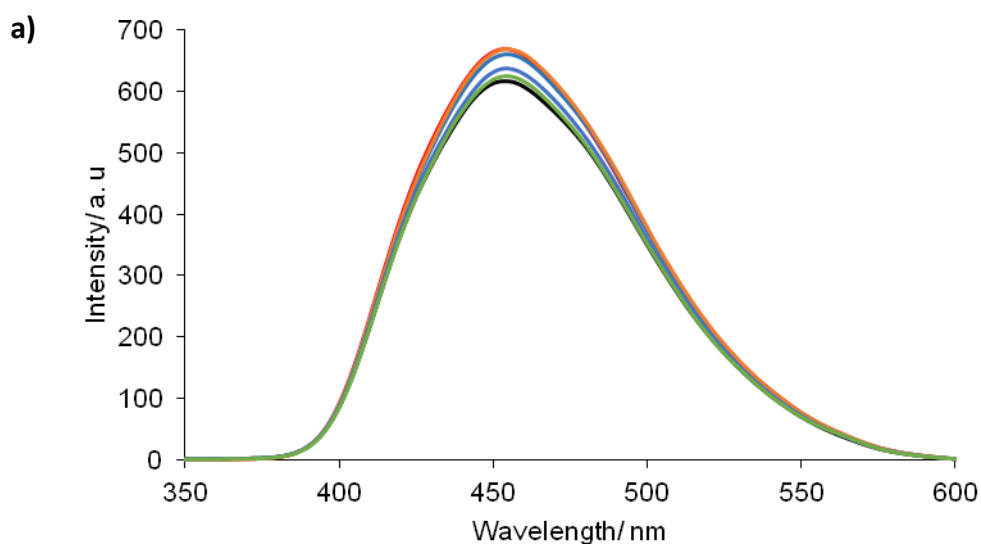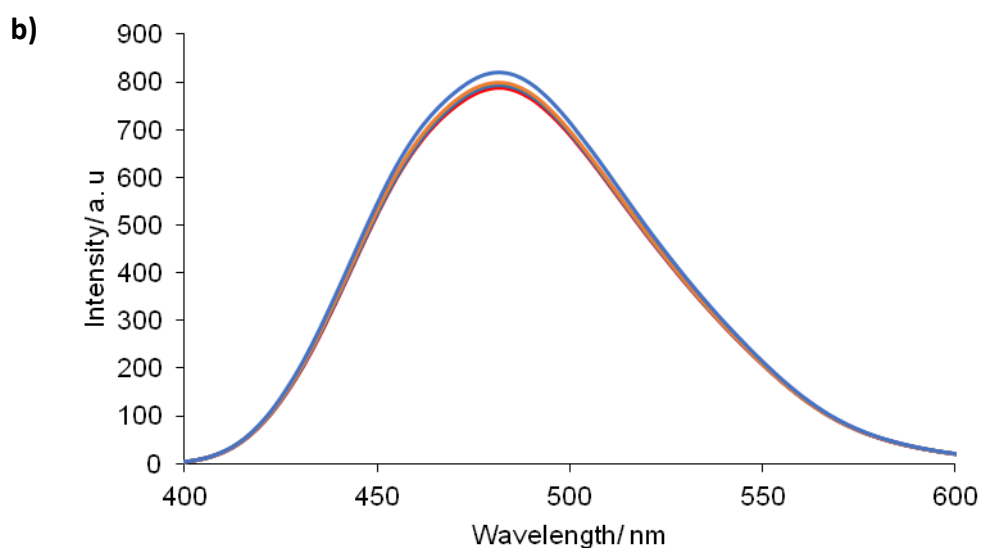

**Figure S3.** a) **1b** (5  $\mu\text{M}$ ) fluorescence emission spectra in cacodylate buffer 0.1 M, pH= 6.0, 5% DMF in the absence and in the presence of increasing concentrations of CT-DNA (2.5-30  $\mu\text{M}$ ). b) **1c** (10  $\mu\text{M}$ ) fluorescence emission spectra in cacodylate buffer 0.1 M, pH= 6.0, 5% DMF in the absence and in the presence of increasing concentrations of CT-DNA (10-60  $\mu\text{M}$ ).

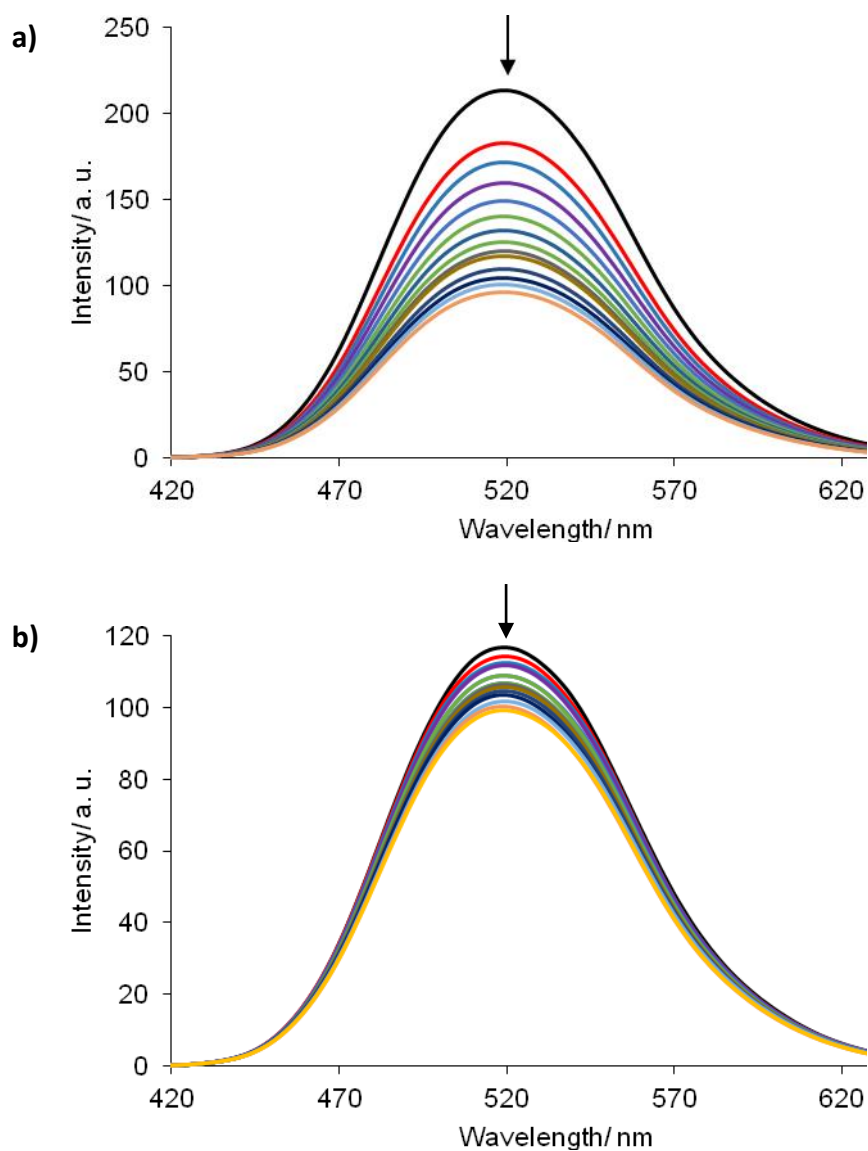

**Figure S4.** a) Fluorescence emission spectra of **1a** (15  $\mu\text{M}$ ) in cacodylate buffer 0.1 M, pH= 6.0, 5% DMF in the absence and the presence of increasing amounts of  $[\text{K}_4\text{Fe}(\text{CN})_6]$  from 0.15  $\mu\text{M}$  to 3  $\mu\text{M}$ . b) Fluorescence emission spectra of **1a** (15  $\mu\text{M}$ ) + CT-DNA (90  $\mu\text{M}$ ) in cacodylate buffer 0.1 M, pH= 6.0, 5% DMF in the absence and in the presence of increasing amounts of  $[\text{K}_4\text{Fe}(\text{CN})_6]$  from 0.15  $\mu\text{M}$  to 3  $\mu\text{M}$ . Arrows indicate the effect of  $[\text{K}_4\text{Fe}(\text{CN})_6]$  in fluorescence emission.

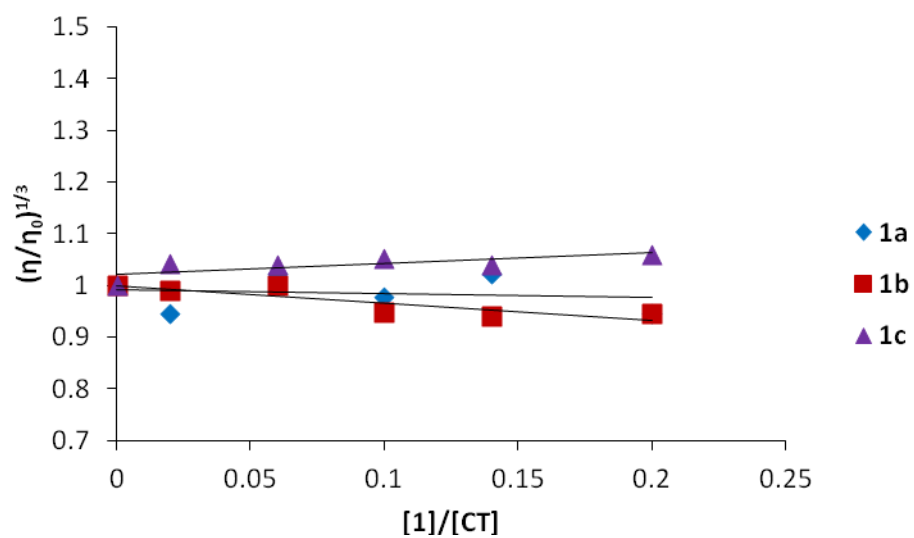

**Figure S5.** Effect of increasing amounts of **1a** (blue diamond); **1b** (red square) and **1c** (violet triangle) on the relative viscosity of CT-DNA.

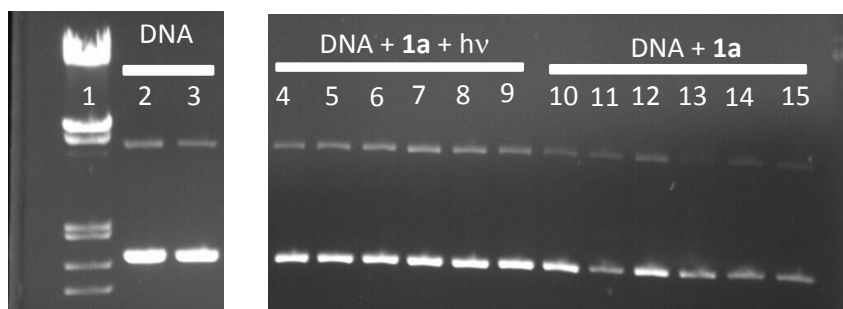

**Figure S6.** Agarose gel electrophoresis of pUC18 of 80  $\mu$ M compound **1a** upon photo-irradiation at 365 nm for 2 h. 1:  $\lambda$ DNA/EcoR1+HindIII Marker; 2: No irradiated DNA control; 3: Irradiated DNA control; 4: **1a** 5  $\mu$ M; 5: **1a** 7.5  $\mu$ M; 6: **1a** 10  $\mu$ M ; 7: **1a** 12.5  $\mu$ M; 8: **1a** 15  $\mu$ M; 9: **1a** 18  $\mu$ M; 10: **1a** 5  $\mu$ M no irradiated; 11: **1a** 7.5  $\mu$ M no irradiated; 12: **1a** 10  $\mu$ M no irradiated; 13: **1a** 12.5  $\mu$ M no irradiated; 14: **1a** 15  $\mu$ M no irradiated; 15: **1a** 18  $\mu$ M no irradiated.

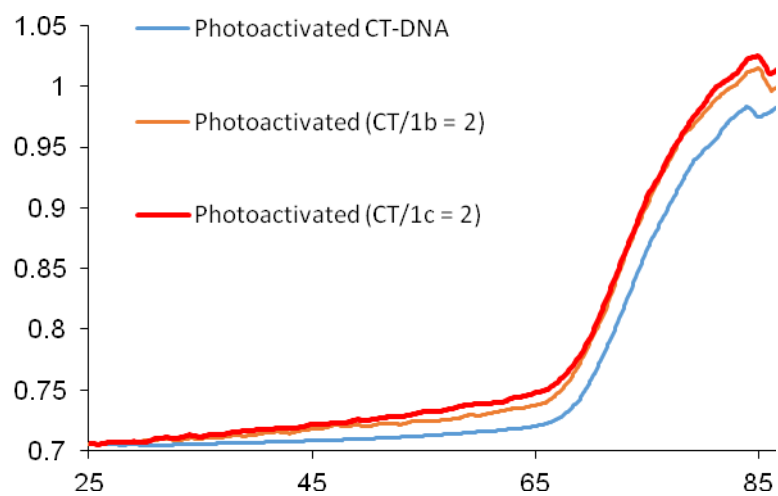

**Figure S7.** Thermal denaturation curves of CT-DNA 100  $\mu$ M (blue) in cacodylate buffer 0.1 M, pH= 6.0, 5% DMF, with 50  $\mu$ M **1b** (orange) or 50  $\mu$ M **1c** (red) upon photoirradiation.



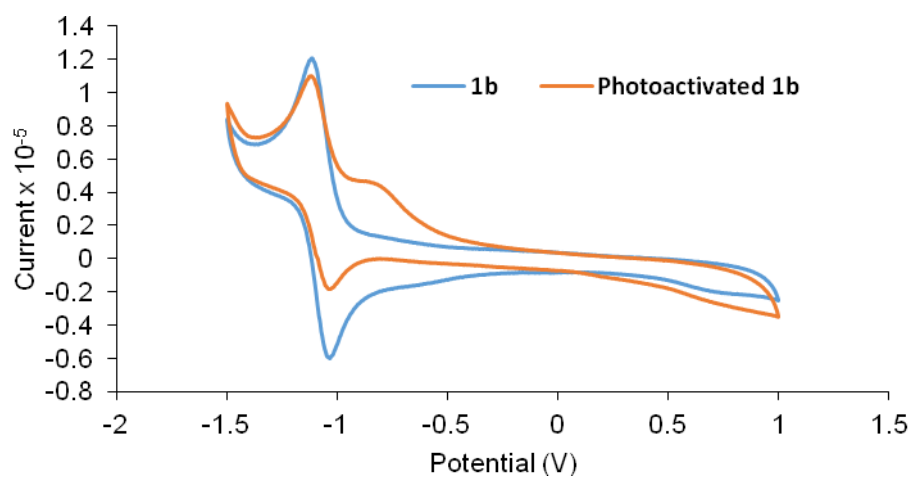

**Figure S8.** Cyclic voltammogram of compound **1b** (2.5 mM in DMF) (blue line) and compound **1b** (2.5 mM in DMF) after photoirradiation at 365 nm for 2 hours (orange line). Scan rate 50 mV/s.

**Table S1.** Relative amounts of the three forms of plasmid DNA after irradiation in the presence of **1b**.

|                  | <b>UVA<br/>Irradiation</b> | <b>Form I (%)± SD</b> | <b>Form II (%)± SD</b> | <b>Form III (%)</b> | <b>S<sup>a</sup></b> |
|------------------|----------------------------|-----------------------|------------------------|---------------------|----------------------|
| <b>DNA</b>       | ✗                          | 94.2 ± 1.2            | 5.8 ± 1.2              | -                   |                      |
| <b>DNA</b>       | ✓                          | 95.5 ± 0.8            | 4.5 ± 0.8              | -                   |                      |
| <b>1b 25 μM</b>  | ✓                          | 46.7 ± 0.9            | 52.8 ± 0.2             | traces              | 0.76                 |
| <b>1b 30 μM</b>  | ✓                          | 39.3 ± 0.4            | 60.2 ± 0.3             | traces              | 0.93                 |
| <b>1b 35 μM</b>  | ✓                          | 40.3 ± 0.4            | 59.2 ± 0.3             | traces              | 0.91                 |
| <b>1b 40 μM</b>  | ✓                          | 38.6 ± 0.9            | 60.8 ± 0.2             | traces              | 0.95                 |
| <b>1b 45 μM</b>  | ✓                          | 36.3 ± 0.5            | 63.1 ± 0.2             | traces              | 1.01                 |
| <b>1b 50 μM</b>  | ✓                          | 28.0 ± 0.0            | 71.5 ± 0.7             | traces              | 1.27                 |
| <b>1b 60 μM</b>  | ✓                          | 27.6 ± 0.6            | 71.9 ± 1.3             | traces              | 1.29                 |
| <b>1b 70 μM</b>  | ✓                          | 8.4 ± 0.6             | 91.1 ± 0.1             | traces              | 2.48                 |
| <b>1b 80 μM</b>  | ✓                          | 3.5 ± 0.7             | 96.0 ± 0.1             | traces              | 3.35                 |
| <b>1b 90 μM</b>  | ✓                          | 4.6 ± 0.9             | 94.9 ± 0.2             | traces              | 3.10                 |
| <b>1b 100 μM</b> | ✓                          | 3.5 ± 0.8             | 96.0 ± 0.1             | traces              | 3.35                 |
| <b>1b 90 μM</b>  | ✗                          | 99.5 ± 0.7            | 0.5 ± 0.7              | -                   |                      |
| <b>1b 100 μM</b> | ✗                          | 98.8 ± 1.2            | 1.2 ± 1.2              | -                   |                      |

S= mean number of single-strand scissions per DNA molecule.

**Table S2.** Relative amounts of the three forms of plasmid DNA after irradiation in the presence of **1c**.

|                  | <b>UVA<br/>Irradiation</b> | <b>Form I (%) ± SD</b> | <b>Form II (%)± SD</b> | <b>Form III (%)</b> | <b>S<sup>a</sup></b> |
|------------------|----------------------------|------------------------|------------------------|---------------------|----------------------|
| <b>DNA</b>       | ✗                          | 96.9 ± 0.1             | 3.1 ± 0.1              | -                   |                      |
| <b>DNA</b>       | ✓                          | 96.3 ± 0.9             | 3.7 ± 0.9              | -                   |                      |
| <b>1c 25 μM</b>  | ✓                          | 73.1 ± 0.2             | 26.8 ± 0.2             | -                   | 0.31                 |
| <b>1c 30 μM</b>  | ✓                          | 59.2 ± 0.4             | 40.7 ± 0.4             | -                   | 0.52                 |
| <b>1c 35 μM</b>  | ✓                          | 65.5 ± 0.7             | 34.5 ± 0.7             | -                   | 0.42                 |
| <b>1c 40 μM</b>  | ✓                          | 66.7 ± 0.3             | 33.2 ± 0.3             | -                   | 0.40                 |
| <b>1c 45 μM</b>  | ✓                          | 59.4 ± 0.7             | 40.5 ± 0.7             | -                   | 0.52                 |
| <b>1c 50 μM</b>  | ✓                          | 56.3 ± 0.5             | 43.7 ± 0.5             | -                   | 0.57                 |
| <b>1c 60 μM</b>  | ✓                          | 49.2 ± 1.6             | 50.3 ± 0.9             | traces              | 0.71                 |
| <b>1c 70 μM</b>  | ✓                          | 46.7 ± 0.9             | 52.8 ± 0.3             | traces              | 0.76                 |
| <b>1c 80 μM</b>  | ✓                          | 40.0 ± 1.4             | 59.5 ± 0.7             | traces              | 0.92                 |
| <b>1c 90 μM</b>  | ✓                          | 38.6 ± 0.9             | 60.9 ± 0.1             | traces              | 0.95                 |
| <b>1c 100 μM</b> | ✓                          | 33.4 ± 0.6             | 66.1 ± 0.1             | traces              | 1.10                 |
| <b>1c 90 μM</b>  | ✗                          | 95.2 ± 0.3             | 4.8 ± 0.3              | -                   |                      |
| <b>1c 100 μM</b> | ✗                          | 99.0 ± 0.0             | 0.97 ± 0.1             | -                   |                      |

S= mean number of single-strand scissions per DNA molecule.

**Table S3.** Relative amounts of the three forms of plasmid DNA after irradiation in the presence of **1b** and different inhibitors.

|                                   | <b>Form I (%)± SD</b> | <b>Form II (%)± SD</b> | <b>Form III (%)</b> |
|-----------------------------------|-----------------------|------------------------|---------------------|
| <b>DNA</b>                        | 96.8 ± 2.5            | 3.2 ± 2.5              | -                   |
| <b>1b 80 μM</b>                   | 8.8 ± 0.3             | 90.7 ± 1.0             | traces              |
| <b>D<sub>2</sub>O<sup>a</sup></b> | -                     | -                      | -                   |
| <b>Sodium formate</b>             | 49.4 ± 0.8            | 50.1 ± 1.5             | traces              |
| <b>KI</b>                         | 98.0 ± 0.8            | 2.0 ± 0.8              | -                   |
| <b>DMSO</b>                       | 72.5 ± 0.7            | 25.5 ± 0.7             | -                   |
| <b>TMP</b>                        | 59.0 ± 0.0            | 40.5 ± 0.7             | traces              |
| <b>DABCO</b>                      | 68.5 ± 0.6            | 30.9 ± 1.3             | traces              |
| <b>NaN<sub>3</sub></b>            | 59.7 ± 0.4            | 39.8 ± 1.0             | traces              |
| <b>Methyl green 3 μM</b>          | 9.8 ± 0.7             | 89.1 ± 1.2             | traces              |
| <b>Methyl green 6 μM</b>          | 10.6 ± 1.3            | 87.1 ± 0.5             | traces              |
| <b>Hoescht 8 μM</b>               | 10.8 ± 3.3            | 88.7 ± 2.5             | traces              |
| <b>Hoescht 16 μM</b>              | 12.5 ± 3.5            | 86.9 ± 2.6             | traces              |
| <b>Tiron 10 μM</b>                | 95.6 ± 3.7            | 4.3 ± 0.4              | -                   |

<sup>a</sup>Data quantification was not possible due to the presence of smearing.

**Table S4.** Relative amounts of the three forms of plasmid DNA after irradiation in the presence of **1c** and different inhibitors.

|                          | <b>Form I (%)± SD</b> | <b>Form II (%)± SD</b> | <b>Form III (%)± SD</b> |
|--------------------------|-----------------------|------------------------|-------------------------|
| <b>DNA</b>               | 96.8 ± 1.3            | 4.7 ± 1.3              | -                       |
| <b>1c 90 μM</b>          | 42.3 ± 0.5            | 57.8 ± 0.3             | traces                  |
| <b>D<sub>2</sub>O</b>    | -                     | 54.7 ± 0.2             | 45.3 ± 0.2              |
| <b>Sodium formate</b>    | 5.9 ± 2.8             | 40.1 ± 2.8             | -                       |
| <b>KI</b>                | 89.3 ± 4.7            | 10.6 ± 0.6             | -                       |
| <b>DMSO</b>              | 54.7 ± 0.2            | 44.8 ± 0.6             | traces                  |
| <b>TMP</b>               | 39.1 ± 2.8            | 60.4 ± 3.1             | traces                  |
| <b>DABCO</b>             | 56.6 ± 1.0            | 42.9 ± 1.4             | traces                  |
| <b>NaN<sub>3</sub></b>   | 46.5 ± 0.3            | 52.7 ± 0.2             | traces                  |
| <b>Methyl green 6 μM</b> | 44.1 ± 0.1            | 56.4 ± 0.3             | traces                  |
| <b>Hoescht 16 μM</b>     | 40.6 ± 1.7            | 58.2 ± 2.0             | traces                  |
| <b>Tiron 10 μM</b>       | 87.6 ± 1.7            | 12.4 ± 1.7             | -                       |
